# Supplementary material
Source: publisher figshare collection journal article supplement (https://acs.figshare.com/ndownloader/files/11825978)
Supplement: Supplementary file 1 [file 11825978]

Compound_ID	Smiles	IC50 avb3	IC50 a5b1	IC50 MDM2	IC50 MDM4
6	[H]\N=C(N)\Nc1cccc(c1)C(=O)NCC(=O)N[C@@H](CC(=O)O)C(=O)Nc2ccccc2	0.21 ± 0.04	13 ± 0.4	> 1000	> 1000
7	[H]\N=C(N)\Nc1cccc(c1)C(=O)NCC(=O)N[C@@H](CC(=O)O)C(=O)NCCc2ccccc2	2.8 ± 0.1	28 ± 4	437 ± 41	219 ± 21
8	[H]\N=C(N)\Nc1cccc(c1)C(=O)NCC(=O)N[C@@H](CC(=O)O)C(=O)NCc2ccccc2	0.79 ± 0.14	31 ± 5	>1000	836 ± 85
9	NC(=[NH2+])Nc1cccc(c1)C(=O)NCC(=O)N[C@@H](CC(=O)[O-])C(=O)NC(c2ccccc2)c3ccccc3	1.4 ± 0.2	22 ± 2	72.0 ± 6.8	77.4 ± 6.9
10	[H]\N=C(N)\Nc1cccc(c1)C(=O)NCC(=O)N[C@@H](CC(=O)O)C(=O)NCCc(c[nH]2)c(c23)cccc3	4.0 ± 0.6	36 ± 8	308 ± 31	> 1000
11	[H]\N=C(N)\Nc1cccc(c1)C(=O)NCC(=O)N[C@@H](CC(=O)O)C(=O)Nc(ccc2)c(c23)cccc3	4.5 ± 2.6	22 ± 3	545 ± 53	81.9 ± 8.5
12	[H]\N=C(N)\Nc1cccc(c1)C(=O)NCC(=O)N[C@@H](CC(=O)O)C(=O)NCCc(cc2)cc(c23)cccc3	2.2 ± 0.8	76 ± 17	370 ± 34	57.5 ± 5.5
13	[H]\N=C(\N)Nc1cccc(c1)C(=O)NCC(=O)N[C@@H](CC(=O)O)C(=O)N[C@H](C)c2ccccc2	1.6 ± 0.3	45 ± 8	685 ± 61	12.1 ± 1.0
14	[H]\N=C(\N)Nc1cccc(c1)C(=O)NCC(=O)N[C@@H](CC(=O)O)C(=O)N[C@@H](C)c2ccccc2	0.91 ± 0.13	20 ± 2	270 ± 41	> 1000
15	[H]\N=C(\N)Nc1cccc(c1)C(=O)NCC(=O)N[C@@H](CC(=O)O)C(=O)NCc2ccc(Cl)cc2	1.3 ± 0.3	48 ± 11	624 ± 63	302 ± 29
16	[H]\N=C(\N)Nc1cccc(c1)C(=O)NCC(=O)N[C@@H](CC(=O)O)C(=O)NCc2ccc(cc2)OC	1.2 ± 0.2	40 ± 11	720 ± 69	> 1000
17	[H]\N=C(\N)Nc1cccc(c1)C(=O)NCC(=O)N[C@@H](CC(=O)O)C(=O)NCC(c2ccccc2)c3ccccc3	0.91 ± 0.19	22 ± 7	> 1000	812 ± 83
18	[H]\N=C(\N)Nc1cccc(c1)C(=O)NCC(=O)N[C@@H](CC(=O)O)C(=O)NCc2cccc(c2)-c3ccccc3	1.2 ± 0.2	18 ± 1	333 ± 31	> 1000
19	[H]\N=C(\N)Nc1cccc(c1)C(=O)NCC(=O)N[C@@H](CC(=O)O)C(=O)NCc2ccc(cc2)-c3ccccc3	1.7 ± 0.3	41 ± 27	389 ± 36	> 1000
